# Supplementary material for: SARS‐CoV‐2 infection in lung transplant recipients induces circulating exosomes with SARS‐CoV‐2 spike protein S2
Source: PubMed Central journal article supplement (PMC8567032; doi:10.1002/ctm2.576), 2021-11-04

**Symptomatic SARSCoV2 positive sample**

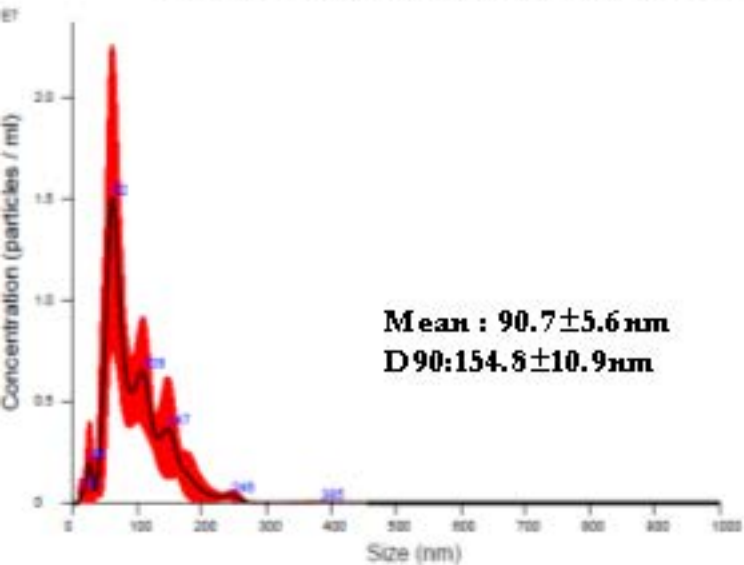

**Asymptomatic SARSCoV2 positive sample**

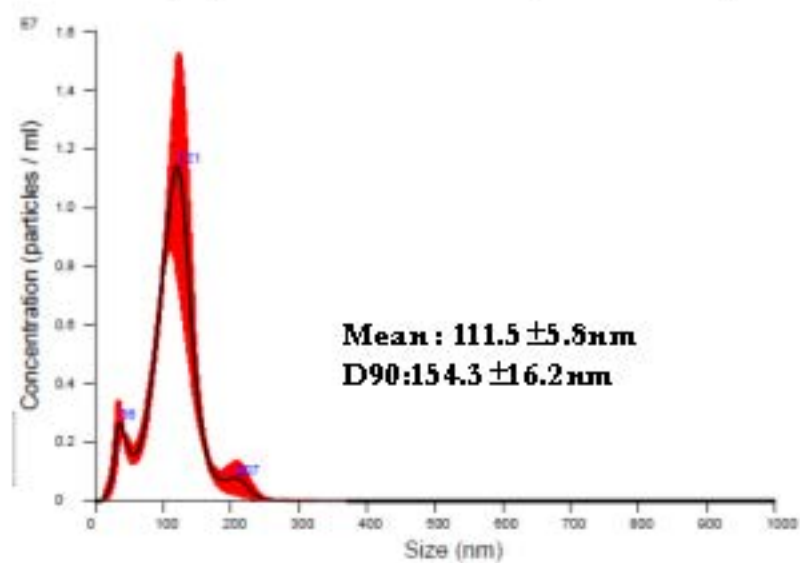

Supplement: CTM2-11-e576-s001.pdf [file CTM2-11-e576-s001.pdf]
